# Supplementary material for: Transition metal dichalcogenide/multi-walled carbon nanotube-based fibers as flexible electrodes for electrocatalytic hydrogen evolution
Source: Royal Society of Chemistry journal article supplement (doi:10.1039/d0cc00506a), 2020-01-01
Supplement: d0cc00506a1.pdf [file d0cc00506a1.pdf]

*Supporting information for*

**Transition Metal Dichalcogenide/Multi-walled Carbon Nanotube-based  
Fibers as Flexible Electrodes for Electrocatalytic Hydrogen Evolution**

Bo Chen,<sup>‡b</sup> Gengzhi Sun,<sup>‡c</sup> Jie Wang,<sup>‡b</sup> Guigao Liu,<sup>b</sup> Chaoliang Tan,<sup>b</sup> Ye Chen,<sup>b</sup> Hongfei Cheng,<sup>b</sup> Junze Chen,<sup>b</sup> Qinglang Ma,<sup>b</sup> Ling Huang,<sup>c</sup> Peng Chen,<sup>d</sup> and Hua Zhang<sup>\*a,e</sup>

---

<sup>a</sup>Department of Chemistry, City University of Hong Kong, Hong Kong, China. E-mail: [hua.zhang@cityu.edu.hk](mailto:hua.zhang@cityu.edu.hk).

<sup>b</sup>Center for Programmable Materials, School of Materials Science and Engineering, Nanyang Technological University, 50 Nanyang Avenue, Singapore 639798, Singapore.

<sup>c</sup>Key Laboratory of Flexible Electronics (KLOFE) & Institute of Advanced Materials (IAM), National Jiangsu Synergistic Innovation Center for Advanced Materials (SICAM), Nanjing Tech University (NanjingTech), 30 South Puzhu Road, Nanjing 211816, P. R. China.

<sup>d</sup>School of Chemical and Biomedical Engineering, Nanyang Technological University, 70 Nanyang Drive, Singapore 637457, Singapore.

<sup>e</sup>Hong Kong Branch of National Precious Metals Material Engineering Research Center (NPMM), City University of Hong Kong, Hong Kong, China.

<sup>‡</sup> These authors contributed equally to this work.

## ***Experimental Section***

### **Chemicals**

Potassium tetrachloroplatinate(II) (99.99% trace metals basis), sodium citrate tribasic dehydrate (99.0%), dimethylformamide (DMF, 99.8%, anhydrous), and 20% Pt on charcoal were purchased from Sigma-Aldrich (Steinheim, Germany). Ethanol (99.9%) was purchased from Merck (Darmstadt, Germany). Bulk MoS<sub>2</sub> (10–30 μm) was purchased from Rose Mill (West Hartford, USA). Lithium ion battery electrolyte was purchased from Charslton Technologies Pte Ltd. (International Business Park, Singapore). Lithium foil and copper foil were purchased from ACME Research Support Pte Ltd. (Bukit Batok Street, Singapore). All chemicals were used as received without further purification unless otherwise noted. Milli-Q water (18.2 MΩ·cm) produced by Milli-Q System (Millipore, Billerica, MA) was used in all experiments.

### **Exfoliation of Transition-Metal Dichalcogenides (TMDs)**

The single- or few-layered TMD (*i.e.* MoS<sub>2</sub>, MoSe<sub>2</sub>, TiS<sub>2</sub>, and MoS<sub>x</sub>Se<sub>2-x</sub>) nanosheets were prepared using the lithium intercalation method developed by our group.<sup>1</sup> Briefly, lithium intercalation process was performed in an electrochemical test cell with Li foil as anode. The electrolyte was prepared by dissolving 1 M LiPF<sub>6</sub> in a mixture of ethyl carbonate and dimethyl carbonate (v:v=1:1). A mixed slurry of MoS<sub>2</sub> powder, acetylene black, and PVDF binder (mass ratio= 8:1:1) was dispersed in N-methylpyrrolidone and used as cathode material, where the resultant mixture was uniformly pasted on a copper foil and dried in vacuum oven at room temperature for 12 h. The lithium intercalation process was carried out in a Neware battery test system, in which the intercalation was then carried out at a discharge current density of 0.05 mA. The resultant Li-intercalated MoS<sub>2</sub> was washed with acetone to eliminate any residual LiPF<sub>6</sub> and then ultra-sonicated to exfoliate MoS<sub>2</sub>.

### **Growth of Pt nanoparticles on TMD nanosheets**

The growth of Pt nanoparticles on TMD nanosheets was carried out by a photochemical reduction method.<sup>2</sup> Typically, 4 mL of TMD nanosheets solution (0.8 mg) were added into 16 mL aqueous solution in a 20 ml glass vial, which contains pre-dissolved 0.3 mM trisodium citrate and 0.2 mM potassium tetrachloroplatinate. After that, the mixed solution was irradiated under a 150 W

halogen lamp (Fiber-Lite MI-150) with 80% of its maximum intensity for 2 h. The ice bath was used to cool the glass vial and prevent the light-induced overheating. After the photochemical reduction reaction was complete, the solution was centrifuged at 6,500 rpm for 15 min and washed with Milli-Q water for 3 times. Finally, the hybrid nanomaterial was re-dispersed in DMF at a concentration of 2 mg mL<sup>-1</sup> and then thoroughly ultra-sonicated before use.

### **Fabrication of fibers and fiber-based electrodes**

The multi-walled carbon nanotube (MWCNT) array was grown by vertically aligning them via chemical vapor deposition (CVD) in a quartz tube furnace following our previous work.<sup>3,4</sup> The MWCNT sheet with an areal density of around 2.12  $\mu\text{g cm}^{-2}$  (single layer) was pulled out from the array.<sup>5</sup> Four layers of the sheets with length of  $\sim 8.5$  cm and width of  $\sim 1.5$  mm were then stacked on each other and laid on a polytetrafluoroethylene (PTFE) substrate. TMD-based active materials, e.g., Pt-MoS<sub>2</sub> nanosheets, dispersed in DMF (2 mg mL<sup>-1</sup>) were then added onto the stacked MWCNT sheet by drop casting. The loading amount (weight percentage) of active material in each fiber was calculated as follows, i.e. loading amount =  $W_g/(W_g+W_h)$ , where  $W_g$  and  $W_h$  represent weight of guest material (TMD-based materials) and weight of host material (MWCNTs), respectively. The loading amount of TMD-based materials was fixed at 90 wt% unless otherwise noted. The resultant hybrid sheet was then dried in a fume hood, and then carefully peeled off from the PTFE substrate. To obtain the hybrid fiber, one end of the hybrid sheet was pasted on the scotch tape, while the other end was twisted by an electric motor, which rotated at 200 rpm for 2 min. The fiber electrode was fabricated by mounting the as-prepared hybrid fiber ( $\sim 0.5$  cm) onto a glass substrate.<sup>6</sup> A Cu wire was connected to one end of the fiber using Ag paste which was subsequently insulated by the silicon rubber. In order to demonstrate the good flexibility and weavability of hybrid fibers, 10 TMD fibers were woven into a white textile. Before being used for the electrocatalytic water splitting, one end of the hybrid fiber/textile sheet was painted with silver paste.

### **Electrocatalytic measurements for HER**

The electrochemical measurements were obtained by an Autolab electrochemical workstation (PGSTAT302N, Metrohm Autolab, Switzerland). Linear sweep voltammetry (LSV) was carried out in 0.5 M H<sub>2</sub>SO<sub>4</sub> or 1 M KOH (deaerated by N<sub>2</sub>) at a scan rate of 2 mVs<sup>-1</sup> from -0.45 to 0.20 V (vs reversible hydrogen electrode (RHE)). The linear regions of the Tafel curves were fitted to the

typical Tafel equation,  $\eta = b \log j + a$ , where  $\eta$ ,  $b$ , and  $j$  are the overpotential, Tafel slope, and the current density, respectively.<sup>7,8</sup> Pt wire was used as the counter electrode (CE), Ag/AgCl electrode (3 M KCl) was used as the reference electrode (RE), and the as-obtained fiber electrode was used as the working electrode (WE). Proton exchange membrane was used to separate CE from WE and RE. All the measured potentials were referenced to the RHE. Cyclic voltammetry (CV) was conducted by using the same three-electrode setup with a scan rate of 100 mVs<sup>-1</sup> at room temperature.

### **Structural characterizations**

Scanning electron microscopy (SEM) was performed using a JSM-7600F field-emission scanning electron microscope operated at an accelerating voltage of 5 kV, and the corresponding energy dispersive X-ray spectroscopy (EDS) was recorded at an accelerating voltage of 20 kV. High-resolution transmission electron microscopy (HRTEM) images, dark-field scanning TEM (DF-STEM) images, and selected area electron diffraction (SAED) patterns were collected using a JEM 2100F transmission electron microscope operated under an accelerating voltage of 200 kV. Raman spectra were taken using a WITec CRM200 confocal Raman microscopy system (WITec Instruments Corp, Germany) with the excitation line of 488 nm at room temperature. The spectrometer was pre-calibrated using Raman band of Si at 520 cm<sup>-1</sup> as the reference.

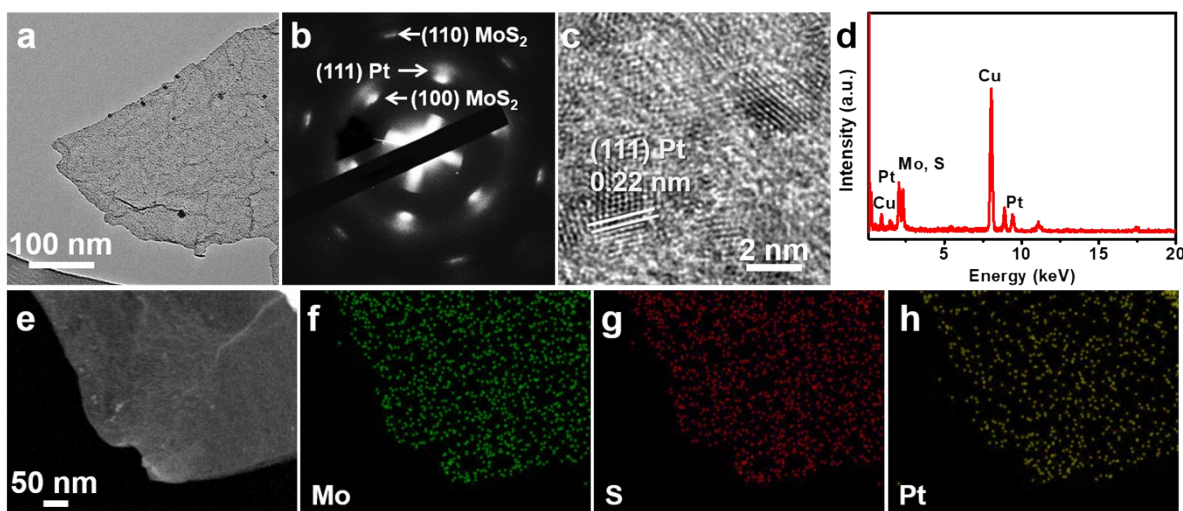

**Fig. S1** (a) TEM image, (b) SAED pattern, (c) HRTEM image, (d) EDS spectrum, (e) DF-STEM image, and (f-h) the corresponding EDS elemental mappings of the obtained Pt-MoS<sub>2</sub> nanosheet.

Fig. S1a and b are the TEM image and SAED pattern of a Pt-MoS<sub>2</sub> nanosheet, respectively. As shown in the HRTEM image (Fig. S1c), the lattice spacing of 0.22 nm corresponds to the (111) planes of Pt. The decoration of Pt in Pt-MoS<sub>2</sub> is further confirmed by the EDS spectrum (Fig. S1d), in which the signals of Pt and Mo (S) peaks are located at 2.06 and 2.30 keV, respectively. The DF-STEM image (Fig. S1e) and EDS elemental mappings (Fig. S1f-h) of the Pt-MoS<sub>2</sub> nanosheet reveal the uniform decoration of Pt nanoparticles on the MoS<sub>2</sub> nanosheet.

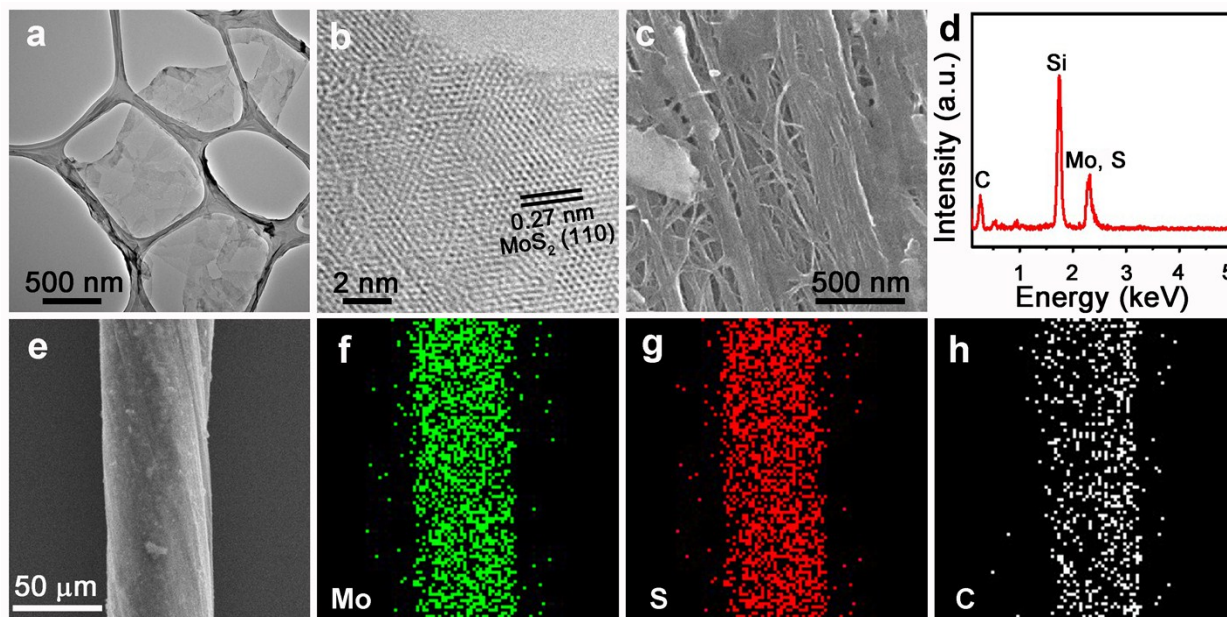

**Fig. S2** (a) TEM and (b) HRTEM images of the obtained MoS<sub>2</sub> nanosheets. (c) High-magnification SEM image, (d) EDS spectrum, (e) low-magnification SEM image, and (f-h) the corresponding EDS elemental mappings of a MoS<sub>2</sub>/MWCNT fiber.

Fig. S2a and b are TEM and HRTEM images of the obtained MoS<sub>2</sub> nanosheets, respectively. As shown in the HRTEM image (Fig. S2b), the lattice spacing of 0.27 nm corresponds to the (110) planes of MoS<sub>2</sub>. Fig. S2c shows a typical high-magnification SEM image of a MoS<sub>2</sub>/MWCNT hybrid fiber. The incorporation of MoS<sub>2</sub> nanosheets in the resultant MoS<sub>2</sub>/MWCNT hybrid fiber is further confirmed by the signal of Mo (S) peak at 2.30 keV in the EDS spectrum (Fig. S2d). The low-magnification SEM image (Fig. S2e) and EDS elemental mappings (Fig. S2f-h) of the MoS<sub>2</sub>/MWCNT hybrid fiber prove the successful incorporation and well distribution of MoS<sub>2</sub> in the hybrid fiber.

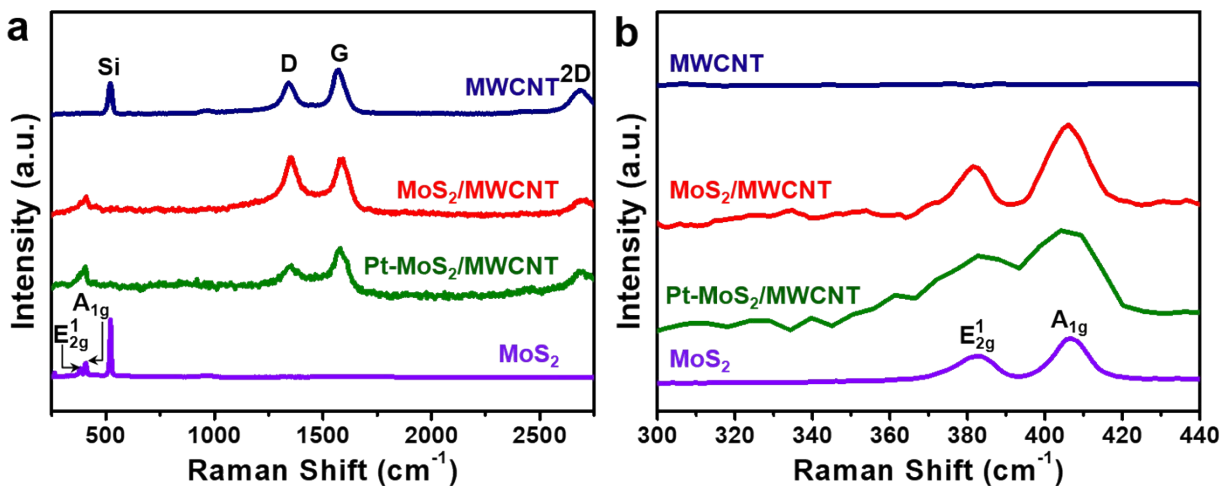

**Fig. S3** Raman spectra of the pure MWCNT fiber, MoS<sub>2</sub>/MWCNT fiber, Pt-MoS<sub>2</sub>/MWCNT fiber, and MoS<sub>2</sub> nanosheets under different grating: (a) 1800 grooves/mm and (b) 600 grooves/mm. The peak at 520 cm<sup>-1</sup> is associated with crystalline Si substrate.

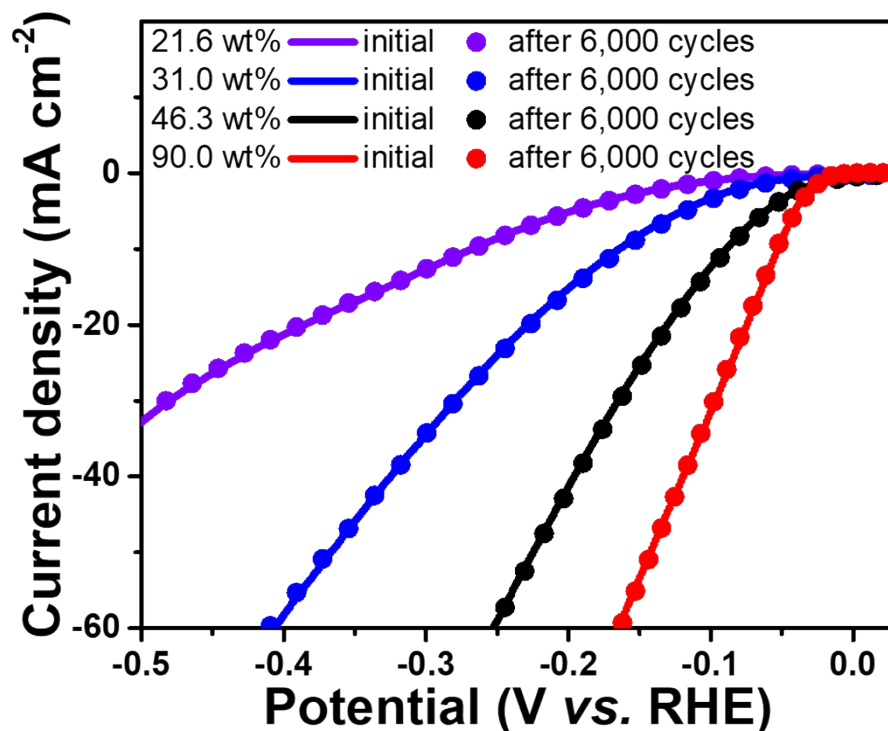

**Fig. S4** Polarization curves of Pt-MoS<sub>2</sub>/MWCNT fibers with different loading amount (wt%) of Pt-MoS<sub>2</sub> before and after continuous potential sweeps at a scan rate of 100 mVs<sup>-1</sup> in 0.5 M H<sub>2</sub>SO<sub>4</sub>.

Polarization curves of Pt-MoS<sub>2</sub>/MWCNT fibers with different loading amount (wt%) of Pt-MoS<sub>2</sub> before and after continuous potential sweeps in 0.5 M H<sub>2</sub>SO<sub>4</sub> are provided in Fig. S4. Negligible HER current loss is observed for all electrodes with different loading amount (wt%) after 6,000 cycles of cyclic voltammetry from -0.45 to 0.20 V vs. RHE, indicating the excellent durability of Pt-MoS<sub>2</sub>/MWCNT fibers with different loading amount (wt%) in acidic environment.



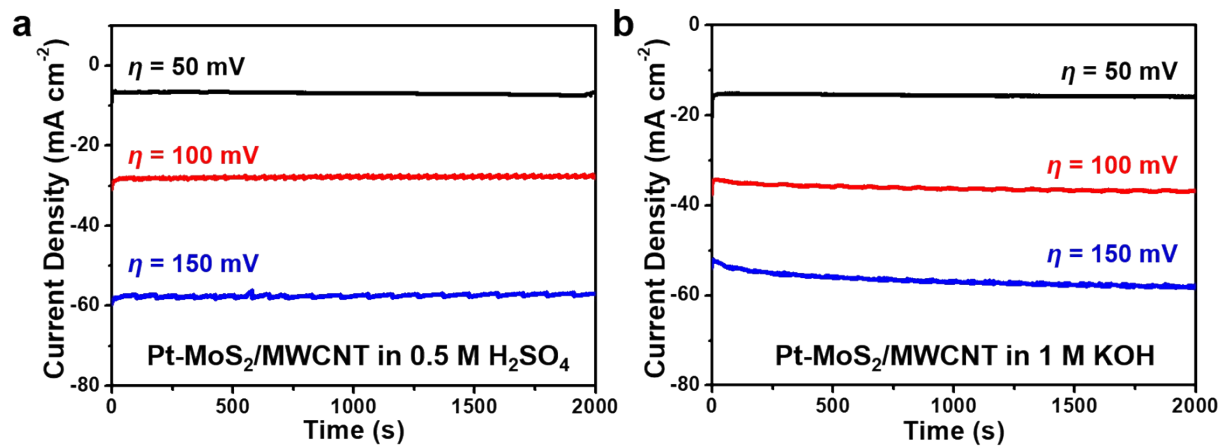

**Fig. S5** Time-dependent current density curves of a Pt-MoS<sub>2</sub>/MWCNT fiber electrode under different static overpotentials (50, 100, and 150 mV) in (a) 0.5 M H<sub>2</sub>SO<sub>4</sub> and (b) 1 M KOH.

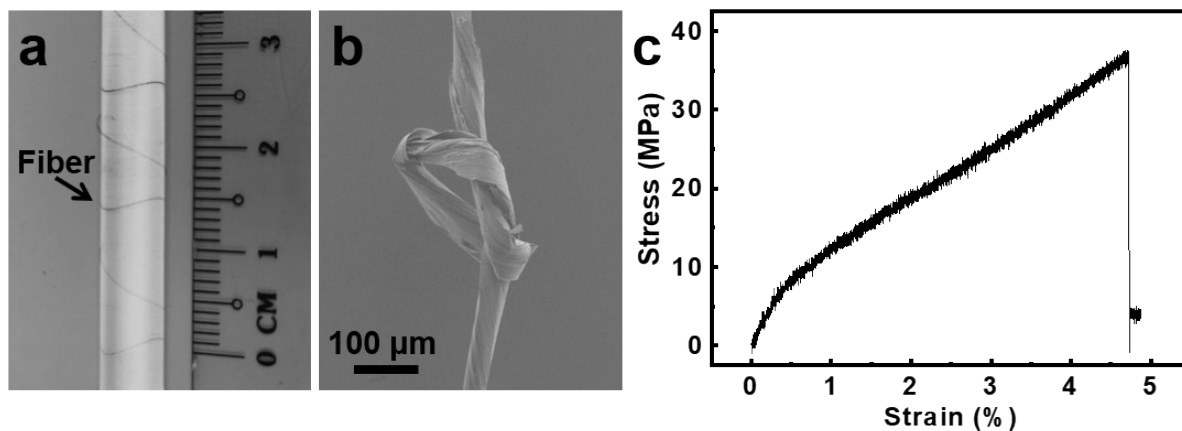

**Fig. S6** (a) Photograph of a Pt-MoS<sub>2</sub>/MWCNT fiber being wound around a glass rod. (b) SEM image of a Pt-MoS<sub>2</sub>/MWCNT fiber being knotted. (c) Stress-strain curve of a Pt-MoS<sub>2</sub>/MWCNT fiber.

As shown in Fig. S6, the as-prepared hybrid fibers are highly flexible and can be wound around a glass rod (Fig. S6a) and knotted (Fig. S6b). Stress-strain test (Fig. S6c) shows the obtained fibers possess a tensile strength of over 35 MPa.

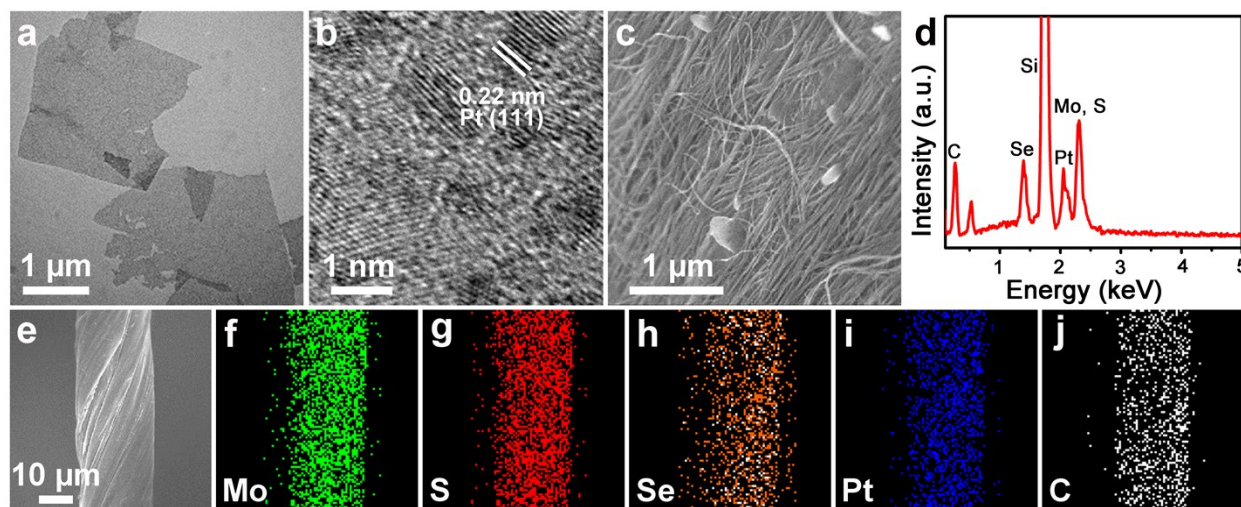

**Fig. S7** (a) TEM and (b) HRTEM images of the obtained Pt-MoS<sub>x</sub>Se<sub>2-x</sub> nanosheets. (c) High-magnification SEM image, (d) EDS spectrum, (e) low-magnification SEM image, and (f-j) the corresponding EDS elemental mappings of a Pt-MoS<sub>x</sub>Se<sub>2-x</sub>/MWCNT fiber.

Fig. S7a and b are TEM and HRTEM images of the obtained Pt-MoS<sub>x</sub>Se<sub>2-x</sub> nanosheets, respectively. As shown in the HRTEM image (Fig. S7b), the lattice spacing of 0.22 nm corresponds to the (111) planes of Pt. Fig. S7c shows a typical high-magnification SEM image of a Pt-MoS<sub>x</sub>Se<sub>2-x</sub>/MWCNT hybrid fiber. The incorporation of Pt-MoS<sub>x</sub>Se<sub>2-x</sub> nanosheets in the resultant Pt-MoS<sub>x</sub>Se<sub>2-x</sub>/MWCNT hybrid fiber is further confirmed by the signals of Se, Pt and Mo (S) peaks located at 1.38, 2.06 and 2.30 keV in the EDS spectrum, respectively (Fig. S7d). The low-magnification SEM image (Fig. S7e) and EDS elemental mappings (Fig. S7f-j) of the Pt-MoS<sub>x</sub>Se<sub>2-x</sub>/MWCNT hybrid fiber prove the successful incorporation and well distribution of Pt-MoS<sub>x</sub>Se<sub>2-x</sub> in the hybrid fiber.

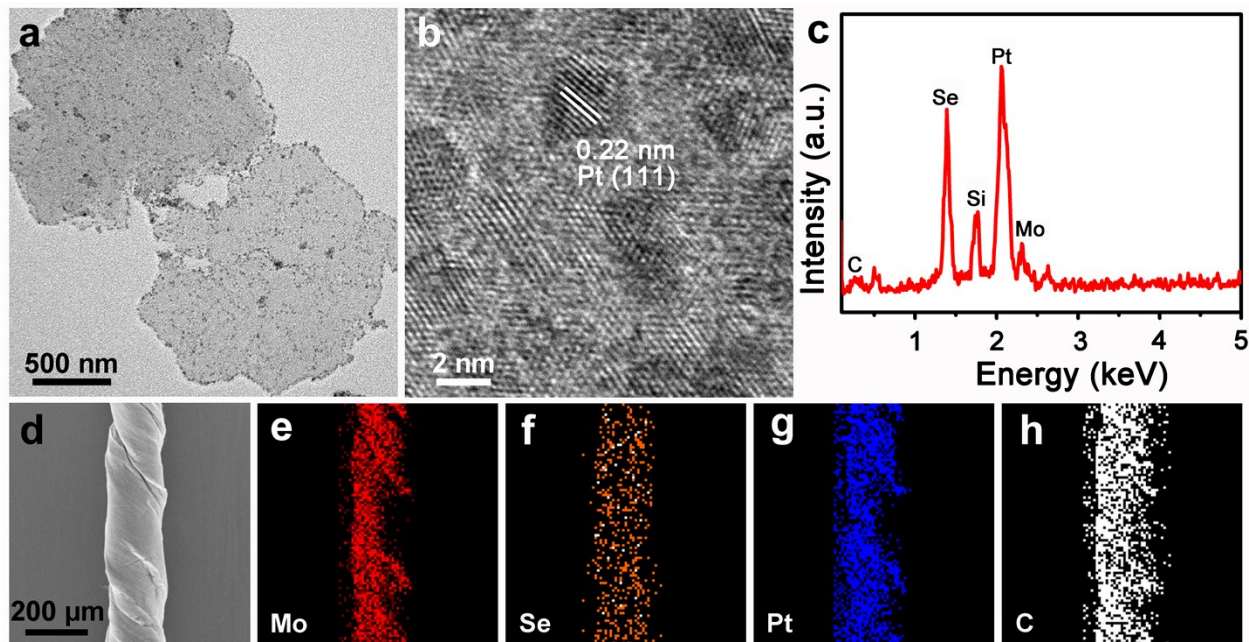

**Fig. S8** (a) TEM and (b) HRTEM images of the obtained Pt-MoSe<sub>2</sub> nanosheets. (c) EDS spectrum, (d) SEM image, and (e-h) the corresponding EDS elemental mappings of a Pt-MoSe<sub>2</sub>/MWCNT fiber.

Fig. S8a and b are TEM and HRTEM images of the obtained Pt-MoSe<sub>2</sub> nanosheets, respectively. As shown in the HRTEM image (Fig. S8b), the lattice spacing of 0.22 nm corresponds to the (111) planes of Pt. The incorporation of Pt-MoSe<sub>2</sub> nanosheets in the resultant Pt-MoSe<sub>2</sub>/MWCNT hybrid fiber is further confirmed by the signals of Se, Pt and Mo peaks located at 1.38, 2.06 and 2.30 keV in the EDS spectrum, respectively (Fig. S8c). The typical SEM image (Fig. S8d) and EDS elemental mappings (Fig. S8e-h) of the Pt-MoSe<sub>2</sub>/MWCNT hybrid fiber prove the successful incorporation and well distribution of Pt-MoSe<sub>2</sub> in the hybrid fiber.

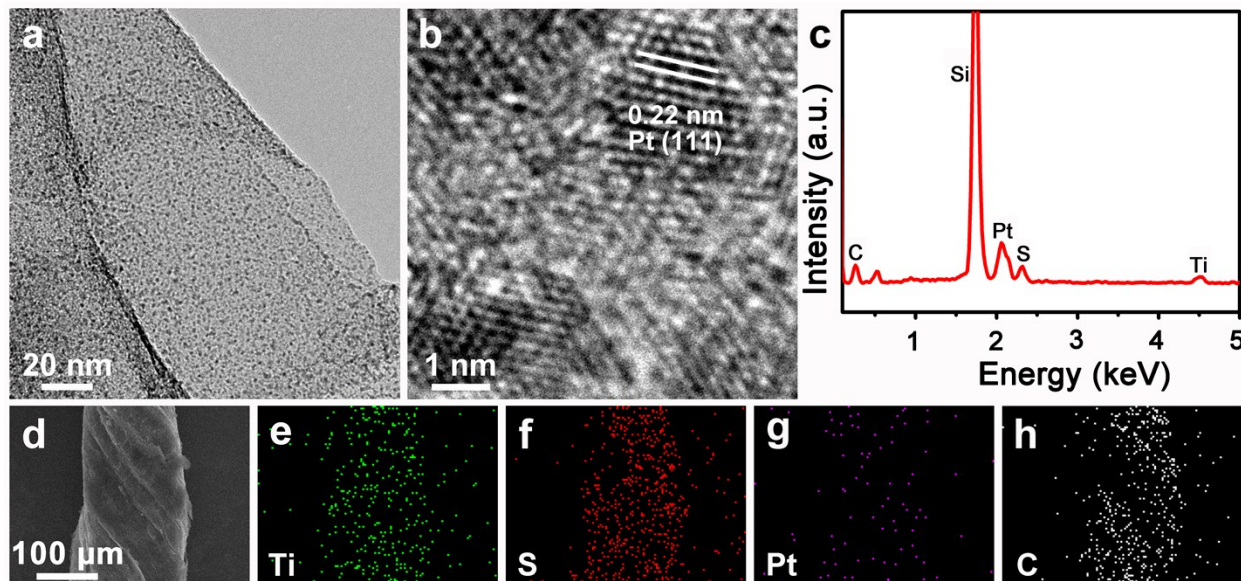

**Fig. S9** (a) TEM and (b) HRTEM images of the obtained Pt-TiS<sub>2</sub> nanosheets. (c) EDS spectrum, (d) SEM image, and (e-h) the corresponding EDS elemental mappings of a Pt-TiS<sub>2</sub>/MWCNT fiber.

Fig. S9a and b are TEM and HRTEM images of the obtained Pt-TiS<sub>2</sub> nanosheets, respectively. As shown in the HRTEM image (Fig. S9b), the lattice spacing of 0.22 nm corresponds to the (111) planes of Pt. The incorporation of Pt-TiS<sub>2</sub> nanosheets in the resultant Pt-TiS<sub>2</sub>/MWCNT hybrid fiber is further confirmed by the signals of Pt, S and Ti peaks located at 2.06, 2.30 and 4.51 keV in the EDS spectrum, , respectively (Fig. S9c). The typical SEM image (Fig. S9d) and EDS elemental mappings (Fig. S9e-h) of the Pt-TiS<sub>2</sub>/MWCNT hybrid fiber prove the successful incorporation and well distribution of Pt-TiS<sub>2</sub> in the hybrid fiber.

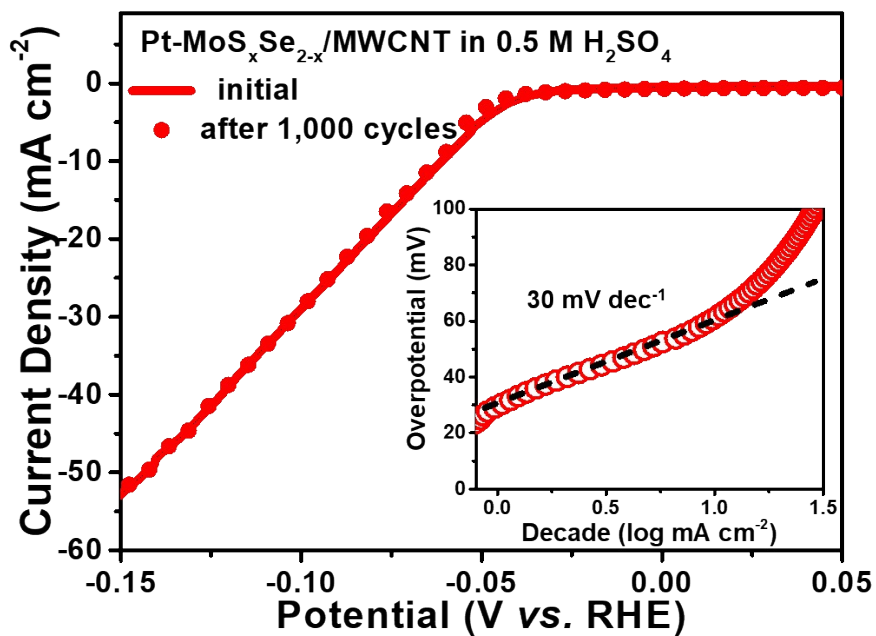

**Fig. S10** Polarization curves of a Pt-MoS<sub>x</sub>Se<sub>2-x</sub>/MWCNT fiber before and after continuous potential sweeps at a scan rate of 100 mVs<sup>-1</sup> in 0.5 M H<sub>2</sub>SO<sub>4</sub>. Negligible HER current loss was observed after 1,000 cycles of cyclic voltammetry from -0.45 to 0.20 V vs. RHE. Inset: the corresponding Tafel plot of the Pt-MoS<sub>x</sub>Se<sub>2-x</sub>/MWCNT fiber before continuous potential sweeps. The dashed line shows the linear region used to estimate the Tafel slope (30 mV dec<sup>-1</sup>).



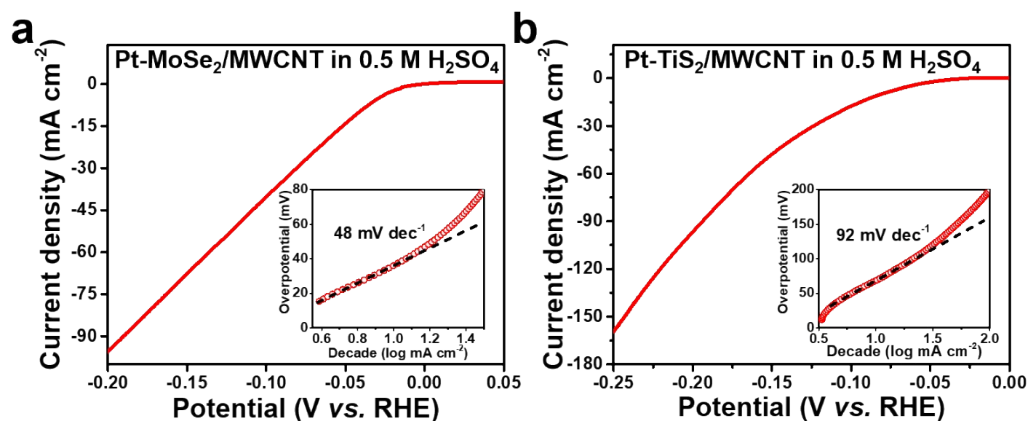

**Fig. S11** Polarization curves of the (a) Pt-MoSe<sub>2</sub>/MWCNT fiber and (b) Pt-TiS<sub>2</sub>/MWCNT fiber at a scan rate of 2 mV s<sup>-1</sup> in 0.5 M H<sub>2</sub>SO<sub>4</sub>. Insets: the corresponding Tafel plots. The dashed lines show the linear regions used to estimate the Tafel slopes.

Pt-MoSe<sub>2</sub>/MWCNT and Pt-TiS<sub>2</sub>/MWCNT fibers were also used as electrodes for HER. As shown in Fig. S11a, the Tafel slope and overpotential at  $j=10 \text{ mA cm}^{-2}$  of the obtained Pt-MoSe<sub>2</sub>/MWCNT fiber are 48 mV dec<sup>-1</sup> and 41 mV, respectively. As shown in Fig. S11b, Tafel slope and overpotential at  $j=10 \text{ mA cm}^{-2}$  of the obtained Pt-TiS<sub>2</sub>/MWCNT fiber are 92 mV dec<sup>-1</sup> and 80 mV, respectively. The HER activities of various fiber electrodes are summarized in Table S1.

**Table S1.** Summary of HER activities of various fiber electrodes.

| Catalyst                                              | Electrolyte                                     | Overpotential<br>at $j=10 \text{ mA cm}^{-2}$<br>(mV) | Overpotential<br>at $j=30 \text{ mA cm}^{-2}$<br>(mV) | Tafel slope<br>( $\text{mV dec}^{-1}$ ) | Tafel<br>region<br>(mV) | Exchange<br>current<br>density<br>( $\text{mA cm}^{-2}$ ) |
|-------------------------------------------------------|-------------------------------------------------|-------------------------------------------------------|-------------------------------------------------------|-----------------------------------------|-------------------------|-----------------------------------------------------------|
| MWCNT fiber                                           | 0.5 M $\text{H}_2\text{SO}_4$                   | —                                                     | —                                                     | 148                                     | 250-330                 | 0.0005                                                    |
| $\text{MoS}_2/\text{MWCNT}$ fiber                     | 0.5 M $\text{H}_2\text{SO}_4$                   | 287                                                   | 374                                                   | 118                                     | 170-280                 | 0.0413                                                    |
| <b>Pt-MoS<sub>2</sub>/MWCNT fiber</b>                 | <b>0.5 M <math>\text{H}_2\text{SO}_4</math></b> | <b>40</b>                                             | <b>72</b>                                             | <b>30</b>                               | <b>20-35</b>            | <b>0.4554</b>                                             |
| Pt-MoS <sub>x</sub> Se <sub>2-x</sub> /MWCNT<br>fiber | 0.5 M $\text{H}_2\text{SO}_4$                   | 63                                                    | 101                                                   | 30                                      | 32-53                   | 0.0975                                                    |
| Pt-MoS <sub>2</sub> /MWCNT fiber                      | 0.5 M $\text{H}_2\text{SO}_4$                   | 41                                                    | 81                                                    | 48                                      | 19-35                   | 0.5352                                                    |
| Pt-TiS <sub>2</sub> /MWCNT fiber                      | 0.5 M $\text{H}_2\text{SO}_4$                   | 80                                                    | 124                                                   | 92                                      | 30-112                  | 1.8571                                                    |
| Pt-MoS <sub>2</sub> /MWCNT fiber                      | 1 M KOH                                         | 31                                                    | 74                                                    | 40                                      | 0-15                    | 3.1622                                                    |

The HER activities of various fiber electrodes are summarized in Table S1. Among all fibers, the Pt-MoS<sub>2</sub>/MWCNT fiber exhibits the best HER performance with the lowest values of overpotential at  $j=10 \text{ mA cm}^{-2}$  (40 mV), overpotential at  $j=30 \text{ mA cm}^{-2}$  (72 mV), and Tafel slope ( $30 \text{ mV dec}^{-1}$ ) in 0.5 M  $\text{H}_2\text{SO}_4$ . The Pt-MoS<sub>2</sub>/MWCNT fiber also possesses excellent catalytic activity in basic electrolyte with an overpotential of 31 mV at current density of  $10 \text{ mA cm}^{-2}$  and Tafel slope of  $40 \text{ mV dec}^{-1}$ .



**Table S2.** Comparison of HER performances of Pt-TMD/MWCNT fibers in this work and other previously reported TMD-based catalysts.

| Catalyst                                                                 | Overpotential (mV)<br>at $j=10 \text{ mA cm}^{-2}$ | Tafel slope<br>( $\text{mV dec}^{-1}$ ) | Ref.             |
|--------------------------------------------------------------------------|----------------------------------------------------|-----------------------------------------|------------------|
| <b>Pt-MoS<sub>2</sub>/MWCNT fiber</b>                                    | <b>40</b>                                          | <b>30</b>                               | <b>This work</b> |
| Pt-MoS <sub>x</sub> Se <sub>2-x</sub> /MWCNT fiber                       | 63                                                 | 30                                      | This work        |
| Pt-MoS <sub>2</sub> /MWCNT fiber                                         | 41                                                 | 48                                      | This work        |
| Pt-TiS <sub>2</sub> /MWCNT fiber                                         | 80                                                 | 92                                      | This work        |
| Au@MoS <sub>2</sub> nanocomposite                                        | 178                                                | 43                                      | 9                |
| Pd-MoS <sub>2</sub>                                                      | 89                                                 | 80                                      | 10               |
| Ir/MoS <sub>2</sub>                                                      | 44                                                 | 32                                      | 11               |
| Pt-MoS <sub>2</sub>                                                      | ~140                                               | 96                                      | 12               |
| Co-doped MoS <sub>2</sub> foam                                           | 156                                                | 74                                      | 13               |
| MoS <sub>2</sub> nanodots                                                | 173                                                | 53                                      | 14               |
| Vertically aligned ultrasmall<br>monolayer MoS <sub>2</sub>              | 126                                                | 67                                      | 15               |
| P-1T-MoS <sub>2</sub>                                                    | 154                                                | 43                                      | 16               |
| MoS <sub>2</sub> with S-vacancies                                        | 320                                                | 102                                     | 17               |
| MoS <sub>2</sub> -BP nanosheets                                          | 85                                                 | 68                                      | 18               |
| MoS <sub>2</sub> with strain and S-vacancies                             | 170                                                | 60                                      | 19               |
| MoS <sub>2</sub> nanoflower-decorated<br>reduced graphene<br>oxide paper | 240                                                | 95                                      | 20               |
| MoS <sub>2</sub> /MWCNT                                                  | 185                                                | 44.6                                    | 21               |
| Defect-rich MoS <sub>2</sub> nanosheets                                  | 200                                                | 50                                      | 22               |
| Vertically MoS <sub>2</sub> aligned layers                               | >400                                               | 75                                      | 23               |
| 2H MoS <sub>2</sub> nanosheets                                           | 300                                                | 75-85                                   | 24               |

The comparison of HER performances of Pt-TMD/MWCNT fibers in this work and other previously reported TMD-based catalysts is summarized in Table S2. Due to the unique structure and synergetic interaction between MWCNTs and Pt-MoS<sub>2</sub> nanosheets, the HER performances of our Pt-TMD/MWCNT fibers are comparable with or even better than many other representative TMD-based catalysts. In particular, the Pt-MoS<sub>2</sub>/MWCNT fiber exhibits best HER performance with an overpotential of 40 mV at current density of 10 mA cm<sup>-2</sup> and Tafel slope of about 30 mV dec<sup>-1</sup> among the catalysts listed in Table S2.

## Reference

- 1 Z. Y. Zeng, T. Sun, J. X. Zhu, X. Huang, Z. Y. Yin, G. Lu, Z. X. Fan, Q. Y. Yan, H. H. Hng and H. Zhang, *Angew. Chem. Int. Ed.*, 2012, **51**, 9052-9056.
- 2 X. Huang, Z. Zeng, S. Bao, M. Wang, X. Qi, Z. Fan and H. Zhang, *Nat. Commun.*, 2013, **4**, 1444.
- 3 G. Z. Sun, Y. X. Huang, L. X. Zheng, Z. Y. Zhan, Y. N. Zhang, J. H. L. Pang, T. Wu and P. Chen, *Nanoscale*, 2011, **3**, 4854-4858.
- 4 G. Z. Sun, L. X. Zheng, J. An, Y. Z. Pan, J. Y. Zhou, Z. Y. Zhan, J. H. L. Pang, C. K. Chua, K. F. Leong and L. Li, *Nanoscale*, 2013, **5**, 2870-2874.
- 5 G. Z. Sun, X. Zhang, R. Z. Lin, J. Yang, H. Zhang and P. Chen, *Angew. Chem. Int. Ed.*, 2015, **54**, 4651-4656.
- 6 G. Z. Sun, J. Y. Zhou, F. Yu, Y. N. Zhang, J. H. L. Pang and L. X. Zheng, *J. Solid State Electrochem.*, 2012, **16**, 1775-1780.
- 7 J. Xie, H. Zhang, S. Li, R. Wang, X. Sun, M. Zhou, J. Zhou, X. W. D. Lou and Y. Xie, *Adv. Mater.*, 2013, **25**, 5807-5813.
- 8 M. Kim, M. A. R. Anjum, M. Lee, B. J. Lee and J. S. Lee, *Adv. Funct. Mater.*, 2019, **29**, 1809151.
- 9 Z. Liu, X. Zhang, Y. Gong, Q. Lu, Z. Zhang, H. Cheng, Q. Ma, J. Chen, M. Zhao, B. Chen, Y. Chen, X.-J. Wu, P. Yin, L. Gu, Y. Du and H. Zhang, *Nano Res.*, 2019, **12**, 1301-1305.
- 10 Z. Luo, Y. Ouyang, H. Zhang, M. Xiao, J. Ge, Z. Jiang, J. Wang, D. Tang, X. Cao, C. Liu and W. Xing, *Nat. Commun.*, 2018, **9**, 2120.
- 11 S. Wei, X. Cui, Y. Xu, B. Shang, Q. Zhang, L. Gu, X. Fan, L. Zheng, C. Hou, H. Huang, S. Wen and W. Zheng, *ACS Energy Lett.*, 2019, **4**, 368-374.
- 12 J. Deng, H. Li, J. Xiao, Y. Tu, D. Deng, H. Yang, H. Tian, J. Li, P. Ren and X. Bao, *Energy Environ. Sci.*, 2015, **8**, 1594-1601.
- 13 J. Deng, H. Li, S. Wang, D. Ding, M. Chen, C. Liu, Z. Tian, K. S. Novoselov, C. Ma, D. Deng and X. Bao, *Nat. Commun.*, 2017, **8**, 14430.
- 14 C. L. Tan, Z. M. Luo, A. Chaturvedi, Y. Q. Cai, Y. H. Du, Y. Gong, Y. Huang, Z. C. Lai, X. Zhang, L. R. Zheng, X. Y. Qi, M. H. Goh, J. Wang, S. K. Han, X. J. Wu, L. Gu, C. Kloc and H. Zhang, *Adv. Mater.*, 2018, **30**, 1705509.
- 15 L.-B. Huang, L. Zhao, Y. Zhang, Y.-Y. Chen, Q.-H. Zhang, H. Luo, X. Zhang, T. Tang, L. Gu and J.-S. Hu, *Adv. Energy Mater.*, 2018, **8**, 1800734.
- 16 Y. Yin, J. Han, Y. Zhang, X. Zhang, P. Xu, Q. Yuan, L. Samad, X. Wang, Y. Wang, Z. Zhang, P. Zhang, X. Cao, B. Song and S. Jin, *J. Am. Chem. Soc.*, 2016, **138**, 7965-7972.
- 17 C. Tsai, H. Li, S. Park, J. Park, H. S. Han, J. K. Nørskov, X. Zheng and F. Abild-Pedersen, *Nat. Commun.*, 2017, **8**, 15113.
- 18 R. He, J. Hua, A. Zhang, C. Wang, J. Peng, W. Chen and J. Zeng, *Nano Lett.*, 2017, **17**, 4311-4316.
- 19 H. Li, C. Tsai, A. L. Koh, L. Cai, A. W. Contryman, A. H. Fragapane, J. Zhao, H. S. Han, H. C. Manoharan, F. Abild-Pedersen, J. K. Nørskov and X. Zheng, *Nat. Mater.*, 2016, **15**, 48-53.
- 20 C.-B. Ma, X. Qi, B. Chen, S. Bao, Z. Yin, X.-J. Wu, Z. Luo, J. Wei, H.-L. Zhang and H. Zhang, *Nanoscale*, 2014, **6**, 5624-5629.
- 21 Y. Yan, X. Ge, Z. Liu, J.-Y. Wang, J.-M. Lee and X. Wang, *Nanoscale*, 2013, **5**, 7768-7771.
- 22 J. Xie, H. Zhang, S. Li, R. Wang, X. Sun, M. Zhou, J. Zhou, X. W. Lou and Y. Xie, *Adv. Mater.*, 2013, **25**, 5807-5813.

- 23 D. Kong, H. Wang, J. J. Cha, M. Pasta, K. J. Koski, J. Yao and Y. Cui, *Nano Lett.*, 2013, **13**, 1341-1347.
- 24 D. Voiry, M. Salehi, R. Silva, T. Fujita, M. Chen, T. Asefa, V. B. Shenoy, G. Eda and M. Chhowalla, *Nano Lett.*, 2013, **13**, 6222-6227.
